# Supplementary material for: BMPRIA is required for osteogenic differentiation and RANKL expression in adult bone marrow mesenchymal stromal cells
Source: PubMed Central journal article supplement (PMC5981611; doi:10.1038/s41598-018-26820-8), 2018-05-31
Supplement: 41598_2018_26820_MOESM1_ESM.pdf [file 41598_2018_26820_MOESM1_ESM.pdf]

## Supplementary Information

# BMPRIA is required for osteogenic differentiation and RANKL expression in adult bone marrow mesenchymal stromal cells

Soma Biswas<sup>1,2</sup>, Ping Li<sup>1</sup>, Hongguang Wu<sup>1</sup>, Md Shafiquzzaman<sup>1</sup>, Shunichi Murakami<sup>3</sup>, Michael D. Schneider<sup>4</sup>, Yuji Mishina<sup>5</sup>, Baojie Li<sup>1\*</sup>, and Jing Li<sup>2\*</sup>

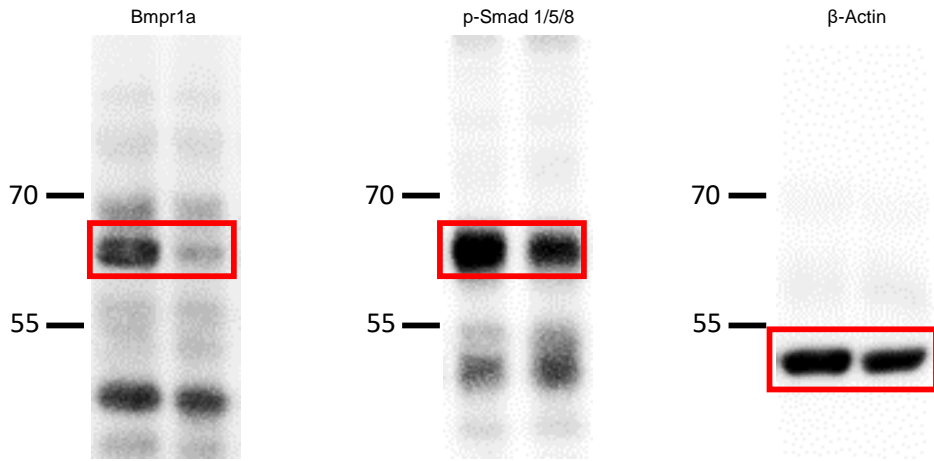

**Supplementary Fig. S1: Full-length blot for Fig. 1e**

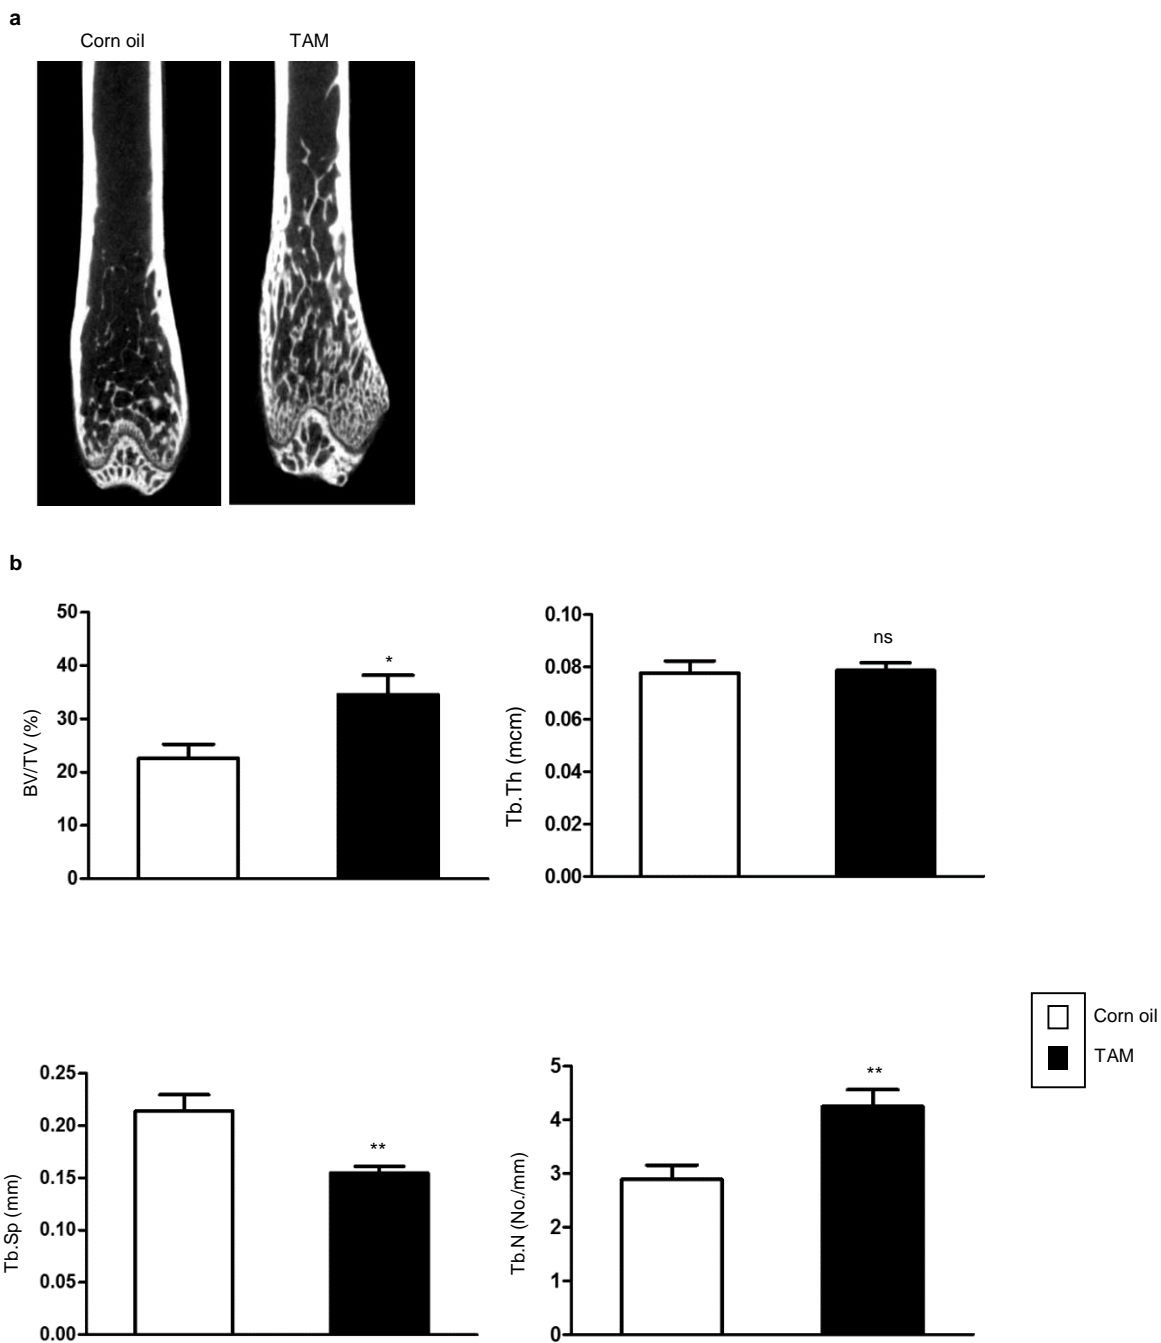

**Supplementary Fig. S2: TAM administration increased bone mass in normal adult mice.**

(a) Representative micro-CT images of femur bones from C57BL/6 mice showing the effect of TAM on bone mass. TAM and corn oil were injected to age- and sex-matched littermates on every other day for 3 doses. One month after the last injection, bone tissues were retrieved and analyzed. TAM-injected bones showed a significant increase in bone density compared to corn oil-injected bones. (b) Micro-CT quantification of several bone indices revealed high trabecular bone mass in TAM-injected mice. Increase in BV/TV, bone volume/tissue volume (%); Tb.N, trabecular number (No./mm); while decrease in Tb.Sp, trabecular spacing (mm) were found in TAM-injected bones. But no significant change in Tb.Th, trabecular thickness (mcm) was observed. N=6 mice per group. \*P < 0.05. \*\*P < 0.01. ns = Non-significant.

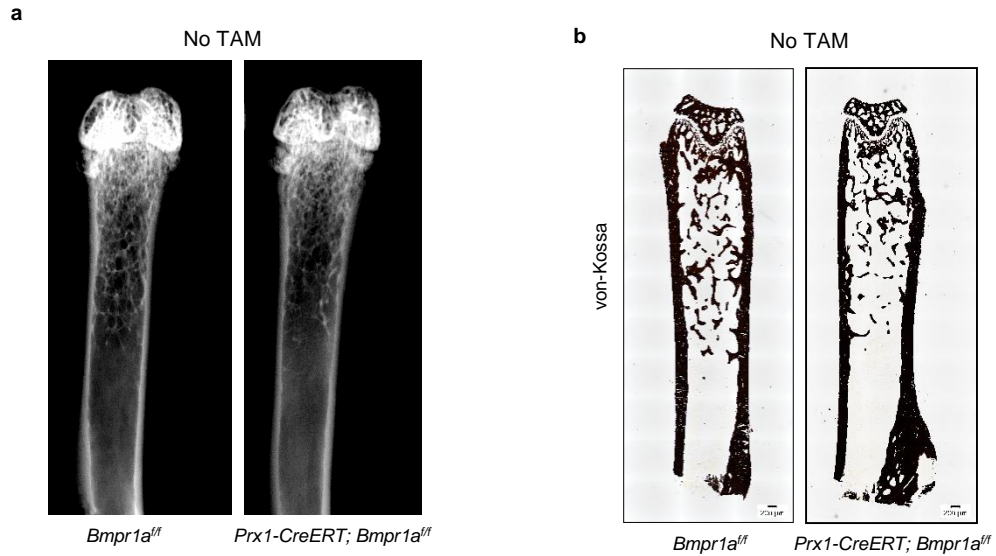

**Supplementary Fig. S3: Radiograph imaging and histological examination of femurs from *Prx1-CreERT; Bmpr1a<sup>fl/fl</sup>* and *Bmpr1a<sup>fl/fl</sup>* mice treated with no tamoxifen.**

(a) X-Ray analysis of long bones from *Prx1-CreERT; Bmpr1a<sup>fl/fl</sup>* and *Bmpr1a<sup>fl/fl</sup>* mice showed no difference in the radiodensity in the absence of tamoxifen injection. N=4 mice/group.

(b) Longitudinal, undecalcified sections of the distal femurs were stained with the von-Kossa method. The results revealed no difference in trabecular bone mass between *Prx1-CreERT; Bmpr1a<sup>fl/fl</sup>* mice and their respective littermates treated with no tamoxifen. Scale bar = 200 $\mu$ m. N=4 mice/group.

a

von-Kossa

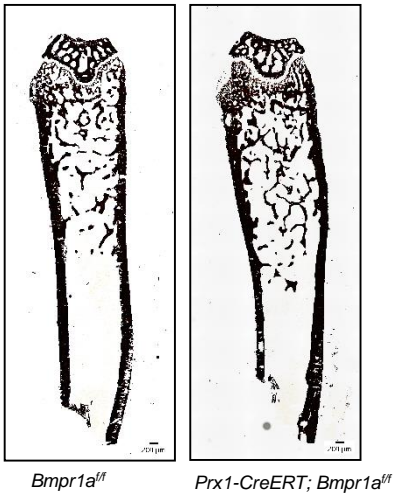

b

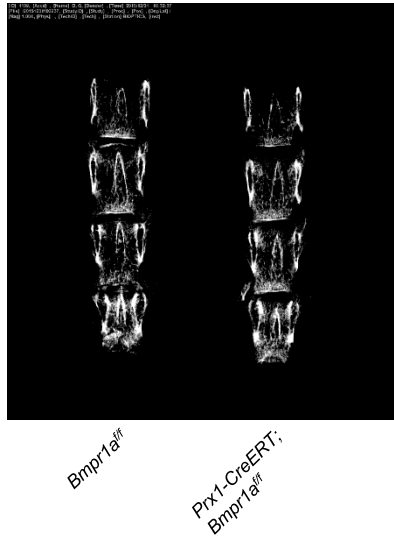

**Supplementary Fig. S4: Assessment of the amount of mineralized bone and radiograph imaging for lumbar vertebrae from *Prx1-CreERT; Bmpr1a<sup>ff</sup>* and *Bmpr1a<sup>ff</sup>* mice.**

(a) Longitudinal, undecalcified sections of the distal femurs were stained with the von-Kossa method. The results revealed increased amount of mineralized bone in *Prx1-CreERT; Bmpr1a<sup>ff</sup>* mice than their respective littermates. Scale bar = 200 $\mu$ m. N=8 mice/group. (b) X-Ray analysis of lumbar vertebrae showed no difference in the radiodensity in *Prx1-CreERT; Bmpr1a<sup>ff</sup>* and control mice. N=4 mice/group.

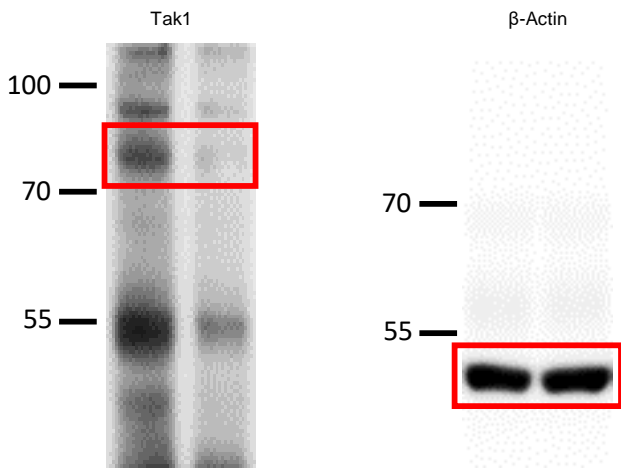

**Supplementary Fig. S5: Full-length blot for Fig. 7a**

a

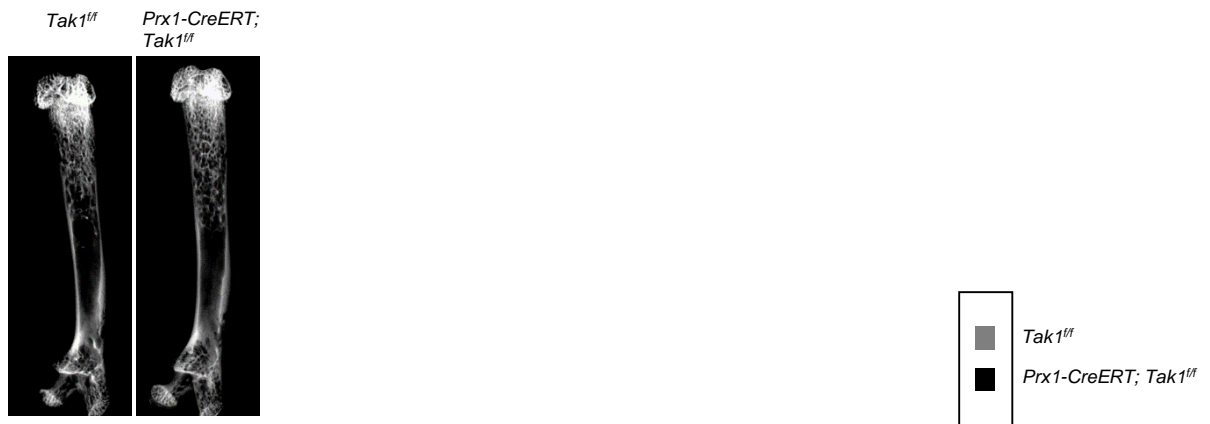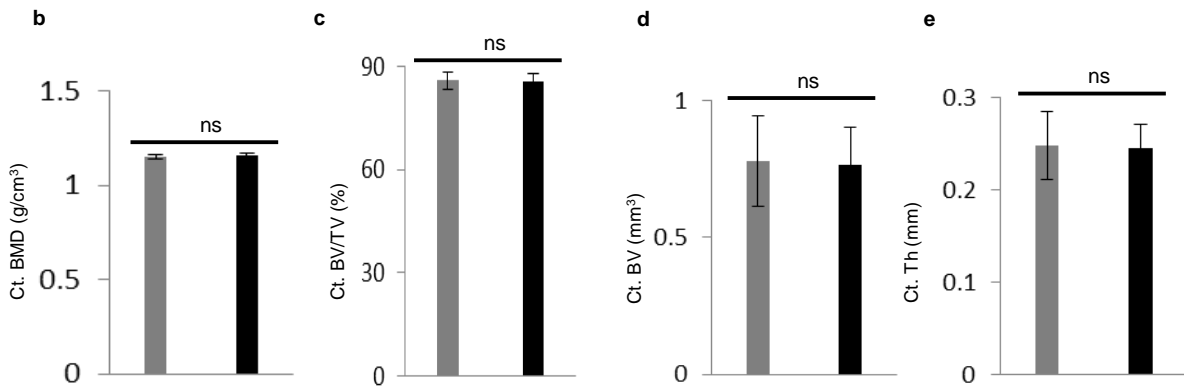

**Supplementary Fig. S6: Radiograph of femurs and micro-CT derived cortical bone morphology parameters from *Prx1-CreERT; Tak1<sup>ff</sup>* and *Tak1<sup>ff</sup>* mice.**

(a) X-ray analysis of long bones showed no significant change in bone mass phenotype between *Prx1-CreERT; Tak1<sup>ff</sup>* mice and WT littermates. N=4 mice/group. (b-e) Micro-CT derived cortical bone morphology parameters revealed no significant difference between mutant and control mice. Ct. BMD, Cortical bone mineral density (g/cm<sup>3</sup>) (b); Ct. BV/TV, cortical bone volume/tissue volume (%) (c); Ct. BV, cortical bone volume (mm<sup>3</sup>) (d); and Ct.Th, cortical thickness (mm) (e). N=6 mice per group. ns = Non-significant.

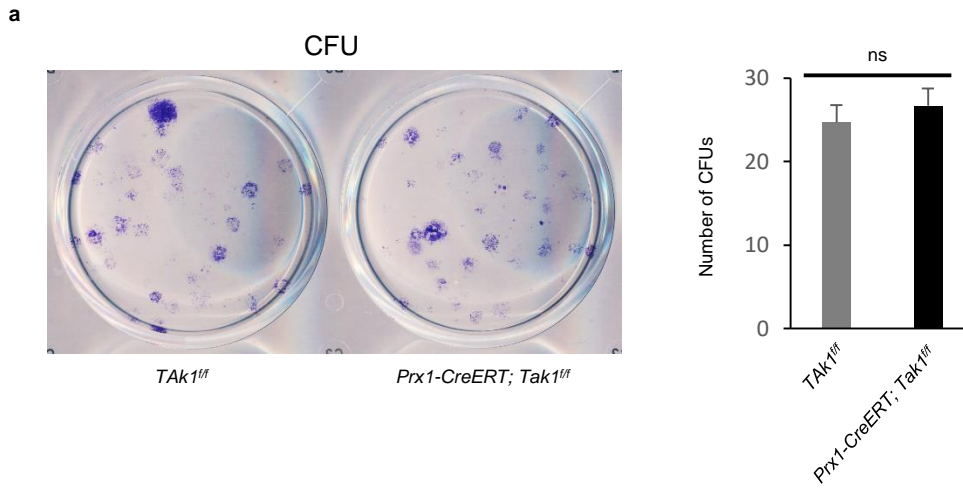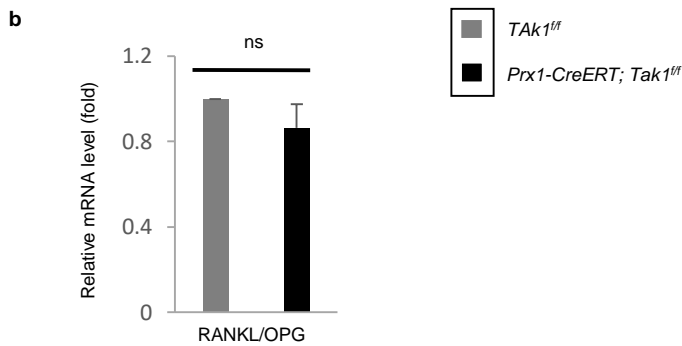

**Supplementary Fig. S7: Bone marrow colony forming units (CFU assay) and mRNA level of Rankl to Opg ratio from BM-MSCs of *Prx1-CreERT; Tak1<sup>ff</sup>* and *Tak1<sup>ff</sup>* mice revealed no significant difference between mutant and control mice.**

(a) In vitro CFU assay carried out from harvested bone marrow MSCs of *Prx1-CreERT; Tak1<sup>ff</sup>* and control littermates resulted no significant difference in the number of ALP-positive CFUs. Left panel: ALP staining. Right panel: quantitation data. N=3 mice per group, ns = Non significant. (b) Quantitative RT-PCR analysis of Rankl and Opg mRNA. Results showed no significant difference in the ratio of Rankl to Opg in *Prx1-CreERT; Tak1<sup>ff</sup>* and control mice at adult stage. N=4 mice. ns = Non significant.



Supplementary Table1: Comparative study of our MSC-specific *Bmpr1a* and previously reported osteoblast/osteocyte-specific *Bmpr1a* knockout mouse lines

|                                                | BM | Ct.M | BR | BF | Ref. |
|------------------------------------------------|----|------|----|----|------|
| <i>Prx1-CreERT; Bmpr1a<sup>fl/fl</sup></i>     | ↑  | ↑    | ↑  | ↓  |      |
| <i>Osteocalcin-Cre; Bmpr1a<sup>fl/fl</sup></i> | ↑  |      | ↑  | ↓  | 21   |
| <i>Col1-CreERT; Bmpr1a<sup>fl/fl</sup></i>     | ↑  |      | ↑  | ↓  | 29   |
| <i>Dmp1-Cre; Bmpr1a<sup>fl/fl</sup></i>        | ↑  | ↓    | NC | ↑  | 31   |

BM = Bone Mass, Ct.M = Cortical bone Mass, BR = Bone resorption, BF = Bone Formation, NC = No change, ↑ = increased, ↓ = decreased
